# Supplementary material
Source: publisher figshare collection journal article supplement (https://acs.figshare.com/ndownloader/files/4214095)
Supplement: Supplementary file 1 [file 4214095]

#\#CIF_1.1

 

#  CIF produced by WinGX routine CIF_UPDATE

#  Created on 2010-08-06 at 16:56:37

#  Using CIFtbx version 2.6.2 16 Jun 1998

 

#  Dictionary name : cif_core.dic

#  Dictionary vers : 2.4

#  Request file    : c:\wingx\files\archive.reqdat

#  CIF files read  : shelxl import struct

 

#------------------ SECTION 1. GLOBAL INFORMATION ---------------------------#

 

data_global

 

#------------------ AUDIT DETAILS -------------------------------------------#

 

_audit_creation_date            2010-08-06

_audit_creation_method          'WinGX routine CIF_UPDATE'

_audit_conform_dict_name        cif_core.dic

_audit_conform_dict_version     2.4

_audit_conform_dict_location    ftp://ftp.iucr.org/pub/cif_core.dic

_audit_update_record            ?

 


 

#------------------  SECTION 2. COMPOUND(S) DETAILS -------------------------#

 

data_shelxl

 

_audit_creation_date                    2010-08-06T16:56:37-00:00

_audit_creation_method                  'WinGX routine CIF_UPDATE'

_audit_conform_dict_name                cif_core.dic

_audit_conform_dict_version             2.4

_audit_conform_dict_location            ftp://ftp.iucr.org/pub/cif_core.dic

_publ_requested_category                FO

 

#----------------------------------------------------------------------------#

#                   CHEMICAL INFORMATION                                     #

#----------------------------------------------------------------------------#

 

_chemical_name_systematic

;

 ?

;

_chemical_name_common                   'RajanBabu 1717'

_chemical_formula_moiety                'C14 H17 N1 O3'

_chemical_formula_sum                   'C14 H17 N O3'

_chemical_formula_weight                247.29

_chemical_compound_source               'synthesis as described'

_chemical_absolute_configuration        unk

 

#----------------------------------------------------------------------------#

#                   UNIT CELL INFORMATION                                    #

#----------------------------------------------------------------------------#

_symmetry_cell_setting                  orthorhombic

_symmetry_space_group_name_H-M          P212121

_symmetry_space_group_name_Hall         'P 2ac 2ab'

_symmetry_Int_Tables_number             19 

loop_

    _symmetry_equiv_pos_as_xyz

'x, y, z'

'-x+1/2, -y, z+1/2'

'x+1/2, -y+1/2, -z'

'-x, y+1/2, -z+1/2'

 

_cell_length_a                          6.3728(1)

_cell_length_b                          12.4132(1)

_cell_length_c                          15.5812(2)

_cell_angle_alpha                       90

_cell_angle_beta                        90

_cell_angle_gamma                       90

_cell_volume                            1232.58(3)

_cell_formula_units_Z                   4

_cell_measurement_temperature           150(2)

_cell_measurement_reflns_used           1662

_cell_measurement_theta_min             2.037

_cell_measurement_theta_max             27.485

_cell_measurement_wavelength            0.71073

 

#----------------------------------------------------------------------------#

#                   CRYSTAL INFORMATION                                      #

#----------------------------------------------------------------------------#

 

_exptl_crystal_description              'rectangular block'

_exptl_crystal_colour                   colourless

_exptl_crystal_size_max                 0.27

_exptl_crystal_size_mid                 0.23

_exptl_crystal_size_min                 0.19

_exptl_crystal_density_diffrn           1.333

_exptl_crystal_density_method           'not measured'

_exptl_crystal_F_000                    528

_exptl_special_details

;All work was done at 150 K using an Oxford Cryosystems Cryostream

Cooler.  The data collection strategy was set up to measure a

hemisphere

of reciprocal space with a redundancy factor of 3.5, which means

that 90% of the reflections were measured at least 3.5 times.

Phi and omega scans with a frame width of one degree were used.

Data integration was done with Denzo, and scaling and merging of

the data was done with Scalepack.


The correct enantiomer could not be determined from the data.

;

 

#----------------------------------------------------------------------------#

#                   ABSORPTION CORRECTION                                    #

#----------------------------------------------------------------------------#

 

_exptl_absorpt_coefficient_mu           0.094

_exptl_absorpt_correction_type          none

 

#----------------------------------------------------------------------------#

#                   DATA COLLECTION                                          #

#----------------------------------------------------------------------------#

 

_diffrn_ambient_temperature             150(2)

_diffrn_radiation_wavelength            0.71073

_diffrn_radiation_type                  MoK\a

_diffrn_radiation_monochromator         graphite

_diffrn_radiation_probe                 x-ray

_diffrn_detector_area_resol_mean        9

_diffrn_orient_matrix_type              'by Nonius Collect from scalepack cell'

_diffrn_orient_matrix_ub_11             -0.0398654

_diffrn_orient_matrix_ub_12             -0.0764467

_diffrn_orient_matrix_ub_13             -0.0119992

_diffrn_orient_matrix_ub_21             0.0992566

_diffrn_orient_matrix_ub_22             -0.0249131

_diffrn_orient_matrix_ub_23             0.0455747

_diffrn_orient_matrix_ub_31             -0.1148119

_diffrn_orient_matrix_ub_32             0.0050064

_diffrn_orient_matrix_ub_33             0.0435664

_diffrn_measurement_device              '95mm CCD camera on \k-goniostat'

_diffrn_measurement_device_type       'Nonius KappaCCD'

_diffrn_measurement_method              CCD

_diffrn_reflns_av_R_equivalents         0.046

_diffrn_reflns_av_unetI/netI            ?

_diffrn_reflns_number                   37104

_diffrn_reflns_limit_h_min              -8

_diffrn_reflns_limit_h_max              8

_diffrn_reflns_limit_k_min              -15

_diffrn_reflns_limit_k_max              16

_diffrn_reflns_limit_l_min              -20

_diffrn_reflns_limit_l_max              20

_diffrn_reflns_theta_min                2.1

_diffrn_reflns_theta_max                27.46

_diffrn_reflns_theta_full               27.46

_diffrn_measured_fraction_theta_full

                                        1

_diffrn_measured_fraction_theta_max

                                        1

_reflns_number_total                    2815

_reflns_number_gt                       2403

_reflns_threshold_expression            >2\s(I)

 

#----------------------------------------------------------------------------#

#                   COMPUTER PROGRAMS USED                                   #

#----------------------------------------------------------------------------#

 

_computing_data_collection              'Collect (Nonius BV, 1997-2000)'

_computing_cell_refinement

                                       'HKL Scalepack (Otwinowski & Minor 1997)'

_computing_data_reduction

                             'HKL Denzo and Scalepack (Otwinowski & Minor 1997)'

_computing_structure_solution      'SHELXS-97 (Sheldrick, 2008)'

_computing_structure_refinement         'SHELXL-97 (Sheldrick, 2008)'

_computing_molecular_graphics           'Ortep-3 for Windows (Farrugia, 1997)'

_computing_publication_material

                                   'WinGX publication routines (Farrugia, 1999)'

 

#----------------------------------------------------------------------------#

#                   STRUCTURE SOLUTION

#----------------------------------------------------------------------------#

 

_atom_sites_solution_primary            direct

_atom_sites_solution_secondary          difmap

_atom_sites_solution_hydrogens          geom

 

#----------------------------------------------------------------------------#

#                   REFINEMENT INFORMATION                                   #

#----------------------------------------------------------------------------#

 

_refine_special_details

;The methyl group hydrogen atoms are included in the model at calculated

positions using a riding model with U(H) = 1.5*Ueq(bonded carbon atom).

The torsion angle, which defines the orientation of the methyl group

about the C-C, C-N, or C-O bond, was refined.  

The remaining hydrogen atoms are included in the model at calculated

positions using a riding model with U(H) = 1.2*Ueq(bonded carbon atom).


 Refinement of F^2^ against ALL reflections.  The weighted R-factor wR and

 goodness of fit S are based on F^2^, conventional R-factors R are based

 on F, with F set to zero for negative F^2^. The threshold expression of

 F^2^ > 2\s(F^2^) is used only for calculating R-factors(gt) etc. and is

 not relevant to the choice of reflections for refinement.  R-factors based

 on F^2^ are statistically about twice as large as those based on F, and R-

 factors based on ALL data will be even larger.

;

_refine_ls_structure_factor_coef        Fsqd

_refine_ls_matrix_type                  full

_refine_ls_weighting_scheme             calc

_refine_ls_weighting_details

  'w=1/[\s^2^(Fo^2^)+(0.0439P)^2^+0.1015P] where P=(Fo^2^+2Fc^2^)/3'

_refine_ls_hydrogen_treatment           constr

_refine_ls_extinction_method            none

_refine_ls_number_reflns                2815

_refine_ls_number_parameters            166

_refine_ls_number_restraints            0

_refine_ls_R_factor_all                 0.0442

_refine_ls_R_factor_gt                  0.0328

_refine_ls_wR_factor_ref                0.0798

_refine_ls_wR_factor_gt                 0.0724

_refine_ls_goodness_of_fit_ref          1.063

_refine_ls_restrained_S_all             1.063

_refine_ls_shift/su_max                 0.001

_refine_ls_shift/su_mean                0

_refine_ls_abs_structure_details      ?

_refine_ls_abs_structure_Flack        ?

_refine_diff_density_max                0.134

_refine_diff_density_min                -0.219

_refine_diff_density_rms                0.048

 

#----------------------------------------------------------------------------#

#                   ATOMIC TYPES, COORDINATES AND THERMAL PARAMETERS         #

#----------------------------------------------------------------------------#

 

loop_

    _atom_type_symbol

    _atom_type_description

    _atom_type_scat_dispersion_real

    _atom_type_scat_dispersion_imag

    _atom_type_scat_source

C C 0.0033 0.0016 'International Tables Vol C Tables 4.2.6.8 and 6.1.1.4'

H H 0 0 'International Tables Vol C Tables 4.2.6.8 and 6.1.1.4'

N N 0.0061 0.0033 'International Tables Vol C Tables 4.2.6.8 and 6.1.1.4'

O O 0.0106 0.006 'International Tables Vol C Tables 4.2.6.8 and 6.1.1.4'

 

loop_

    _atom_site_label

    _atom_site_type_symbol

    _atom_site_fract_x

    _atom_site_fract_y

    _atom_site_fract_z

    _atom_site_U_iso_or_equiv

    _atom_site_adp_type

    _atom_site_occupancy

    _atom_site_symmetry_multiplicity

    _atom_site_calc_flag

    _atom_site_refinement_flags

    _atom_site_disorder_assembly

    _atom_site_disorder_group

C1 C 1.0824(2) -0.04202(11) 0.93525(9) 0.0171(3) Uani 1 1 d . . .

C2 C 1.1896(2) -0.09643(11) 1.00002(8) 0.0200(3) Uani 1 1 d . . .

H2 H 1.1959 -0.0658 1.0559 0.024 Uiso 1 1 calc R . .

C3 C 1.2875(2) -0.19458(12) 0.98459(9) 0.0222(3) Uani 1 1 d . . .

H3 H 1.3588 -0.2306 1.0298 0.027 Uiso 1 1 calc R . .

C4 C 1.2813(2) -0.23995(11) 0.90337(9) 0.0234(3) Uani 1 1 d . . .

H4 H 1.3499 -0.3065 0.8925 0.028 Uiso 1 1 calc R . .

C5 C 1.1744(2) -0.18761(11) 0.83806(9) 0.0207(3) Uani 1 1 d . . .

H5 H 1.1695 -0.2186 0.7823 0.025 Uiso 1 1 calc R . .

C6 C 1.07430(19) -0.09000(11) 0.85374(9) 0.0169(3) Uani 1 1 d . . .

C7 C 0.7587(2) -0.01003(10) 0.78886(9) 0.0207(3) Uani 1 1 d . . .

C8 C 0.6552(2) -0.02839(12) 0.87466(9) 0.0234(3) Uani 1 1 d . . .

H8A H 0.681 -0.1038 0.8925 0.028 Uiso 1 1 calc R . .

H8B H 0.5018 -0.0193 0.8678 0.028 Uiso 1 1 calc R . .

C9 C 0.7311(2) 0.04712(12) 0.94630(9) 0.0240(3) Uani 1 1 d . . .

H9A H 0.6848 0.0174 1.0022 0.029 Uiso 1 1 calc R . .

H9B H 0.6622 0.118 0.9389 0.029 Uiso 1 1 calc R . .

C10 C 0.9708(2) 0.06461(11) 0.94961(9) 0.0189(3) Uani 1 1 d . . .

C11 C 1.0785(2) -0.02150(12) 0.70305(9) 0.0243(3) Uani 1 1 d . . .

H11A H 1.0558 -0.0848 0.6666 0.036 Uiso 1 1 calc R . .

H11B H 1.229 -0.0128 0.714 0.036 Uiso 1 1 calc R . .

H11C H 1.0247 0.0428 0.674 0.036 Uiso 1 1 calc R . .

C12 C 1.0277(3) 0.11907(12) 1.03562(9) 0.0272(3) Uani 1 1 d . . .

H12A H 0.9812 0.0734 1.0833 0.041 Uiso 1 1 calc R . .

H12B H 0.958 0.1893 1.0393 0.041 Uiso 1 1 calc R . .

H12C H 1.18 0.1291 1.0389 0.041 Uiso 1 1 calc R . .

C13 C 1.0338(2) 0.14755(11) 0.88109(9) 0.0196(3) Uani 1 1 d . . .

C14 C 1.3125(2) 0.21733(12) 0.79683(10) 0.0289(3) Uani 1 1 d . . .

H14A H 1.236 0.2059 0.743 0.043 Uiso 1 1 calc R . .

H14B H 1.4628 0.2061 0.7871 0.043 Uiso 1 1 calc R . .

H14C H 1.2888 0.2911 0.817 0.043 Uiso 1 1 calc R . .

N N 0.96760(17) -0.03608(9) 0.78488(7) 0.0184(2) Uani 1 1 d . . .

O1 O 0.66574(16) 0.02587(8) 0.72600(7) 0.0290(3) Uani 1 1 d . . .

O2 O 0.91731(16) 0.21529(8) 0.85258(7) 0.0290(3) Uani 1 1 d . . .

O3 O 1.23812(15) 0.14167(7) 0.86096(6) 0.0235(2) Uani 1 1 d . . .

 

loop_

    _atom_site_aniso_label

    _atom_site_aniso_U_11

    _atom_site_aniso_U_22

    _atom_site_aniso_U_33

    _atom_site_aniso_U_23

    _atom_site_aniso_U_13

    _atom_site_aniso_U_12

C1 0.0149(6) 0.0174(6) 0.0191(7) 0.0011(5) 0.0014(5) -0.0025(5)

C2 0.0191(7) 0.0228(7) 0.0180(7) 0.0028(6) -0.0014(6) -0.0023(6)

C3 0.0175(7) 0.0231(7) 0.0261(7) 0.0068(6) -0.0023(6) -0.0011(6)

C4 0.0180(7) 0.0192(7) 0.0330(8) 0.0009(6) 0.0005(6) 0.0014(6)

C5 0.0185(7) 0.0210(7) 0.0226(7) -0.0016(6) 0.0009(6) -0.0016(6)

C6 0.0139(6) 0.0184(6) 0.0184(6) 0.0021(6) -0.0008(5) -0.0031(5)

C7 0.0193(6) 0.0190(7) 0.0237(7) -0.0014(6) -0.0043(6) -0.0018(5)

C8 0.0156(6) 0.0253(7) 0.0292(8) 0.0034(6) 0.0001(6) 0.0004(6)

C9 0.0222(7) 0.0270(8) 0.0228(7) 0.0019(6) 0.0040(6) 0.0045(6)

C10 0.0208(7) 0.0194(7) 0.0165(7) 0.0002(5) 0.0005(6) 0.0016(5)

C11 0.0292(8) 0.0261(8) 0.0175(7) 0.0004(6) 0.0033(6) -0.0015(6)

C12 0.0391(9) 0.0232(8) 0.0195(7) -0.0030(6) -0.0009(6) 0.0030(7)

C13 0.0235(7) 0.0177(7) 0.0177(7) -0.0020(5) -0.0006(6) 0.0009(6)

C14 0.0324(8) 0.0262(8) 0.0280(8) 0.0066(6) 0.0036(7) -0.0054(6)

N 0.0187(6) 0.0207(6) 0.0159(6) 0.0013(5) -0.0012(5) 0.0007(5)

O1 0.0257(5) 0.0348(6) 0.0266(6) 0.0027(5) -0.0082(5) 0.0041(5)

O2 0.0316(6) 0.0255(6) 0.0299(6) 0.0073(5) 0.0011(5) 0.0074(5)

O3 0.0221(5) 0.0211(5) 0.0275(5) 0.0063(4) 0.0018(4) -0.0030(4)

 

 

#----------------------------------------------------------------------------#

#                   MOLECULAR GEOMETRY                                       #

#----------------------------------------------------------------------------#

 

_geom_special_details

;

 All s.u.'s (except the s.u. in the dihedral angle between two l.s. planes)

 are estimated using the full covariance matrix.  The cell s.u.'s are taken

 into account individually in the estimation of s.u.'s in distances, angles

 and torsion angles; correlations between s.u.'s in cell parameters are only

 used when they are defined by crystal symmetry.  An approximate (isotropic)

 treatment of cell s.u.'s is used for estimating s.u.'s involving l.s. planes.

;

loop_

    _geom_bond_atom_site_label_1

    _geom_bond_atom_site_label_2

    _geom_bond_distance

    _geom_bond_site_symmetry_2

    _geom_bond_publ_flag

C1 C2 1.3933(19) . ?

C1 C6 1.4037(19) . ?

C1 C10 1.5194(19) . ?

C2 C3 1.390(2) . ?

C2 H2 0.95 . ?

C3 C4 1.386(2) . ?

C3 H3 0.95 . ?

C4 C5 1.386(2) . ?

C4 H4 0.95 . ?

C5 C6 1.3910(19) . ?

C5 H5 0.95 . ?

C6 N 1.4358(17) . ?

C7 O1 1.2282(16) . ?

C7 N 1.3714(18) . ?

C7 C8 1.508(2) . ?

C8 C9 1.536(2) . ?

C8 H8A 0.99 . ?

C8 H8B 0.99 . ?

C9 C10 1.5435(19) . ?

C9 H9A 0.99 . ?

C9 H9B 0.99 . ?

C10 C13 1.5366(19) . ?

C10 C12 1.5443(19) . ?

C11 N 1.4689(17) . ?

C11 H11A 0.98 . ?

C11 H11B 0.98 . ?

C11 H11C 0.98 . ?

C12 H12A 0.98 . ?

C12 H12B 0.98 . ?

C12 H12C 0.98 . ?

C13 O2 1.2065(16) . ?

C13 O3 1.3412(18) . ?

C14 O3 1.4508(16) . ?

C14 H14A 0.98 . ?

C14 H14B 0.98 . ?

C14 H14C 0.98 . ?

 

loop_

    _geom_angle_atom_site_label_1

    _geom_angle_atom_site_label_2

    _geom_angle_atom_site_label_3

    _geom_angle

    _geom_angle_site_symmetry_1

    _geom_angle_site_symmetry_3

    _geom_angle_publ_flag

C2 C1 C6 117.89(12) . . ?

C2 C1 C10 123.04(12) . . ?

C6 C1 C10 119.05(12) . . ?

C3 C2 C1 121.31(12) . . ?

C3 C2 H2 119.3 . . ?

C1 C2 H2 119.3 . . ?

C4 C3 C2 120.09(13) . . ?

C4 C3 H3 120 . . ?

C2 C3 H3 120 . . ?

C3 C4 C5 119.60(13) . . ?

C3 C4 H4 120.2 . . ?

C5 C4 H4 120.2 . . ?

C4 C5 C6 120.31(13) . . ?

C4 C5 H5 119.8 . . ?

C6 C5 H5 119.8 . . ?

C5 C6 C1 120.77(12) . . ?

C5 C6 N 119.47(12) . . ?

C1 C6 N 119.72(12) . . ?

O1 C7 N 121.18(13) . . ?

O1 C7 C8 123.41(13) . . ?

N C7 C8 115.41(12) . . ?

C7 C8 C9 114.47(12) . . ?

C7 C8 H8A 108.6 . . ?

C9 C8 H8A 108.6 . . ?

C7 C8 H8B 108.6 . . ?

C9 C8 H8B 108.6 . . ?

H8A C8 H8B 107.6 . . ?

C8 C9 C10 114.95(12) . . ?

C8 C9 H9A 108.5 . . ?

C10 C9 H9A 108.5 . . ?

C8 C9 H9B 108.5 . . ?

C10 C9 H9B 108.5 . . ?

H9A C9 H9B 107.5 . . ?

C1 C10 C13 111.03(11) . . ?

C1 C10 C9 109.64(11) . . ?

C13 C10 C9 109.26(12) . . ?

C1 C10 C12 113.53(11) . . ?

C13 C10 C12 104.37(11) . . ?

C9 C10 C12 108.84(12) . . ?

N C11 H11A 109.5 . . ?

N C11 H11B 109.5 . . ?

H11A C11 H11B 109.5 . . ?

N C11 H11C 109.5 . . ?

H11A C11 H11C 109.5 . . ?

H11B C11 H11C 109.5 . . ?

C10 C12 H12A 109.5 . . ?

C10 C12 H12B 109.5 . . ?

H12A C12 H12B 109.5 . . ?

C10 C12 H12C 109.5 . . ?

H12A C12 H12C 109.5 . . ?

H12B C12 H12C 109.5 . . ?

O2 C13 O3 123.31(13) . . ?

O2 C13 C10 124.18(13) . . ?

O3 C13 C10 112.33(11) . . ?

O3 C14 H14A 109.5 . . ?

O3 C14 H14B 109.5 . . ?

H14A C14 H14B 109.5 . . ?

O3 C14 H14C 109.5 . . ?

H14A C14 H14C 109.5 . . ?

H14B C14 H14C 109.5 . . ?

C7 N C6 122.40(11) . . ?

C7 N C11 118.50(11) . . ?

C6 N C11 118.57(11) . . ?

C13 O3 C14 116.29(11) . . ?

 

loop_

    _geom_torsion_atom_site_label_1

    _geom_torsion_atom_site_label_2

    _geom_torsion_atom_site_label_3

    _geom_torsion_atom_site_label_4

    _geom_torsion

    _geom_torsion_site_symmetry_1

    _geom_torsion_site_symmetry_2

    _geom_torsion_site_symmetry_3

    _geom_torsion_site_symmetry_4

    _geom_torsion_publ_flag

C6 C1 C2 C3 0.66(19) . . . . ?

C10 C1 C2 C3 179.13(12) . . . . ?

C1 C2 C3 C4 0.5(2) . . . . ?

C2 C3 C4 C5 -0.9(2) . . . . ?

C3 C4 C5 C6 0.2(2) . . . . ?

C4 C5 C6 C1 1.03(19) . . . . ?

C4 C5 C6 N 178.88(12) . . . . ?

C2 C1 C6 C5 -1.42(18) . . . . ?

C10 C1 C6 C5 -179.96(12) . . . . ?

C2 C1 C6 N -179.27(11) . . . . ?

C10 C1 C6 N 2.19(18) . . . . ?

O1 C7 C8 C9 -111.78(15) . . . . ?

N C7 C8 C9 68.09(16) . . . . ?

C7 C8 C9 C10 -43.43(17) . . . . ?

C2 C1 C10 C13 130.12(13) . . . . ?

C6 C1 C10 C13 -51.42(16) . . . . ?

C2 C1 C10 C9 -109.06(15) . . . . ?

C6 C1 C10 C9 69.40(15) . . . . ?

C2 C1 C10 C12 12.90(18) . . . . ?

C6 C1 C10 C12 -168.64(12) . . . . ?

C8 C9 C10 C1 -42.17(16) . . . . ?

C8 C9 C10 C13 79.72(14) . . . . ?

C8 C9 C10 C12 -166.90(11) . . . . ?

C1 C10 C13 O2 145.93(13) . . . . ?

C9 C10 C13 O2 24.88(19) . . . . ?

C12 C10 C13 O2 -91.39(16) . . . . ?

C1 C10 C13 O3 -38.80(16) . . . . ?

C9 C10 C13 O3 -159.85(11) . . . . ?

C12 C10 C13 O3 83.88(13) . . . . ?

O1 C7 N C6 -172.37(12) . . . . ?

C8 C7 N C6 7.76(18) . . . . ?

O1 C7 N C11 -0.81(19) . . . . ?

C8 C7 N C11 179.32(12) . . . . ?

C5 C6 N C7 122.50(14) . . . . ?

C1 C6 N C7 -59.62(17) . . . . ?

C5 C6 N C11 -49.05(17) . . . . ?

C1 C6 N C11 128.82(13) . . . . ?

O2 C13 O3 C14 -4.49(19) . . . . ?

C10 C13 O3 C14 -179.81(11) . . . . ?

 

# END of CIF
